# Supplementary material for: Chitosan Treatment of E-11 Cells Modulates Transcription of Nonspecific Immune Genes and Reduces Nodavirus Capsid Protein Gene Expression
Source: MDPI journal article supplement (doi:10.3390/ani11113097), 2021-10-29
Supplement: s1 [file s1]

**Table S1.** Modulation of Nodavirus RNA expression levels impacted by chitosan (0.3%) treatment mode: preventive (mode 1), curative (mode 2) or incubated mixed solutions (mode 3) at different sampling points. UN: undefined value. Cal gene: calibrator gene. *The expression profiles of nodavirus RNA2 was studied using qPCR and the data presented as the average of the relative quantification (RQ) of the target genes after normalization by the reference gene  $\beta$ -actin  $\pm$  SD. The  $\beta$ -actin gene showed the lowest Ct value changes compared to other housekeeping genes and had a specific melting peak (data not shown). Hence, this gene was used as the internal control. The fold change in expression of the target genes in each of the sample groups were determined with respect to the calibrator gene at each time point.*

| Sampling time                                                                                    | Ct viral RNA | Ct b-actin RNA | $\Delta$ CT | $\Delta\Delta$ CT | RQ        | Mean      | SD       |
|--------------------------------------------------------------------------------------------------|--------------|----------------|-------------|-------------------|-----------|-----------|----------|
| <i>Inoculation of E-11 cell with RGNNV nodavirus only</i>                                        |              |                |             |                   |           |           |          |
| 6 hpi                                                                                            | 18.90        | 18.83          | 0.067       | -8.66             | 405.42    | 406.83    | 1.99     |
|                                                                                                  | 18.79        | 18.742         | 0.057       | -8.67             | 408.24    |           |          |
| 24 hpi                                                                                           | 18.98        | 20.99          | -2.00       | -10.73            | 1706.71   | 1628.75   | 110.24   |
|                                                                                                  | 19.00        | 20.87          | -1.86       | -10.59            | 1550.8    |           |          |
| 48 hpi                                                                                           | 18.94        | 21.75          | -2.804      | -11.53            | 2965.99   | 2774.02   | 271.49   |
|                                                                                                  | 18.99        | 21.6           | -2.604      | -11.33            | 2582.05   |           |          |
| 72 hpi                                                                                           | 18.97        | 22.163         | -3.186      | -11.91            | 3865.13   | 4059.11   | 274.34   |
|                                                                                                  | 18.90        | 22.226         | -3.324      | -12.05            | 4253.1    |           |          |
| Cal gene                                                                                         | 32.99        | 24.26          | 8.73        | 0                 | 1         | UN        | UN       |
| <i>Inoculation of RGNNV nodavirus on E-11 treated with CHT at 0.3%: Preventive mode (mode 1)</i> |              |                |             |                   |           |           |          |
| 6 hpi                                                                                            | 27.28        | 26.447         | 0.842       | -7.8883           | 236.927   | 251.09    | 20.03    |
|                                                                                                  | 27.25        | 26.578         | 0.679       | -8.0513           | 265.267   |           |          |
| 24 hpi                                                                                           | 26.25        | 25.946         | 0.306       | -8.4238           | 343.413   | 310.76    | 46.17    |
|                                                                                                  | 26.51        | 25.907         | 0.610       | -8.1195           | 278.108   |           |          |
| 48 hpi                                                                                           | 27.41        | 26.107         | 1.306       | -7.4239           | 171.718   | 184.45    | 18.00    |
|                                                                                                  | 27.21        | 26.110         | 1.106       | -7.6234           | 197.184   |           |          |
| 72 hpi                                                                                           | 33.83        | 34.539         | -0.70       | -9.4375           | 693.379   | 695.69    | 3.27     |
|                                                                                                  | 33.83        | 34.548         | -0.71       | -9.4471           | 698.008   |           |          |
| Cal gene                                                                                         | 32.99        | 24.260         | 8.730       | 0                 | 1         | UN        | UN       |
| <i>Inoculation of RGNNV nodavirus on E-11 treated with CHT at 0.3%: Curative mode (mode 2)</i>   |              |                |             |                   |           |           |          |
| 6 hpi                                                                                            | 24.63        | 26.447         | -1.812      | -10.54            | 1491.24   | 1381.36   | 155.39   |
|                                                                                                  | 24.99        | 26.578         | -1.582      | -10.312           | 1271.48   |           |          |
| 24 hpi                                                                                           | 24.25        | 25.9465        | -1.693      | -10.423           | 1373.6512 | 912.71    | 651.85   |
|                                                                                                  | 25.81        | 25.9072        | -0.089      | -8.8195           | 451.78732 |           |          |
| 48 hpi                                                                                           | 25.61        | 26.1076        | -0.493      | -9.2239           | 597.95785 | 541.74    | 79.50    |
|                                                                                                  | 25.91        | 26.1101        | -0.193      | -8.9234           | 485.52440 |           |          |
| 72 hpi                                                                                           | 26.83        | 34.5392        | -7.707      | -16.437           | 88752.49  | 122696.61 | 48004.24 |
|                                                                                                  | 26.02        | 34.5488        | -8.526      | -17.257           | 156640.74 |           |          |
| Cal gene                                                                                         | 32.99        | 24.2607        | 8.730       | 0                 | 1         | UN        | UN       |
| <i>Inoculation of RGNNV nodavirus on E-11 treated with CHT at 0.3%: Mixed mode (mode 3)</i>      |              |                |             |                   |           |           |          |
| 6 hpi                                                                                            | 25.63        | 26.447         | -0.812      | -9.5423           | 745.62    | 690.68    | 77.69    |
|                                                                                                  | 25.99        | 26.578         | -0.582      | -9.3123           | 635.74    |           |          |
| 24 hpi                                                                                           | 26.25        | 25.9465        | 0.306       | -8.4238           | 343.41    | 284.65    | 83.09    |
|                                                                                                  | 26.81        | 25.9072        | 0.910       | -7.8195           | 225.89    |           |          |
| 48 hpi                                                                                           | 27.61        | 26.1076        | 1.506       | -7.2239           | 149.48    | 196.12583 | 65.95    |
|                                                                                                  | 26.91        | 26.1101        | 0.806       | -7.9234           | 242.76    |           |          |
| 72 hpi                                                                                           | 27.83        | 34.5392        | -6.707      | -15.437           | 44376.24  | 46294.045 | 2712.17  |
|                                                                                                  | 27.72        | 34.5488        | -6.826      | -15.557           | 48211.8   |           |          |
| Cal gene                                                                                         | 32.99        | 24.2607        | 8.730       | 0                 | 1         | UN        | UN       |

**Table S2.** Modulation of Nodavirus RNA expression levels impacted by preventive chitosan E-11 cell treatments at different concentrations and sampling points.

| Sampling time                                                          | Ct viral RNA | Ct b-actin RNA | $\Delta$ CT | $\Delta\Delta$ CT | RQ        | Mean    | SD         |
|------------------------------------------------------------------------|--------------|----------------|-------------|-------------------|-----------|---------|------------|
| <i>Inoculation of E-11 cell with RGNNV nodavirus only</i>              |              |                |             |                   |           |         |            |
| 6 hpi                                                                  | 18.90        | 18.83          | 0.067       | -8.66             | 405.42    | 406.83  | 1.99       |
|                                                                        | 18.79        | 18.742         | 0.057       | -8.67             | 408.24    |         |            |
| 24 hpi                                                                 | 18.98        | 20.99          | -2.00       | -10.73            | 1706.71   | 1628.75 | 110.24     |
|                                                                        | 19.00        | 20.87          | -1.86       | -10.59            | 1550.8    |         |            |
| 48 hpi                                                                 | 18.94        | 21.75          | -2.804      | -11.53            | 2965.99   | 2774.02 | 271.49     |
|                                                                        | 18.99        | 21.6           | -2.604      | -11.33            | 2582.05   |         |            |
| 72 hpi                                                                 | 18.97        | 22.163         | -3.186      | -11.91            | 3865.13   | 4059.11 | 274.34     |
|                                                                        | 18.90        | 22.226         | -3.324      | -12.05            | 4253.1    |         |            |
| Cal gene                                                               | 32.99        | 24.26          | 8.73        | 0                 | 1         | UN      | UN         |
| <i>Inoculation of RGNNV nodavirus on E-11 treated with CHT at 0.3%</i> |              |                |             |                   |           |         |            |
| 6 hpi                                                                  | 27.28        | 26.447         | 0.842       | -7.8883           | 236.927   | 251.09  | 20.03      |
|                                                                        | 27.25        | 26.578         | 0.679       | -8.0513           | 265.267   |         |            |
| 24 hpi                                                                 | 26.25        | 25.946         | 0.306       | -8.4238           | 343.413   | 310.76  | 46.17      |
|                                                                        | 26.51        | 25.907         | 0.610       | -8.1195           | 278.108   |         |            |
| 48 hpi                                                                 | 27.41        | 26.107         | 1.306       | -7.4239           | 171.718   | 184.45  | 18.00      |
|                                                                        | 27.21        | 26.110         | 1.106       | -7.6234           | 197.184   |         |            |
| 72 hpi                                                                 | 33.83        | 34.539         | -0.70       | -9.4375           | 693.379   | 695.69  | 3.27       |
|                                                                        | 33.83        | 34.548         | -0.71       | -9.4471           | 698.008   |         |            |
| Cal gene                                                               | 32.99        | 24.260         | 8.730       | 0                 | 1         | UN      | UN         |
| <i>Inoculation of RGNNV nodavirus on E-11 treated with CHT at 0.5%</i> |              |                |             |                   |           |         |            |
| 6 hpi                                                                  | 25.06        | 25.037         | 0.03        | -8.70             | 415.95    | 464.92  | 69.24      |
|                                                                        | 25.05        | 25.332         | -0.275      | -9.00             | 513.88    |         |            |
| 24 hpi                                                                 | 24.99        | 25.401         | -0.405      | -9.13             | 562.34    | 520.73  | 58.83      |
|                                                                        | 24.03        | 24.205         | -0.174      | -8.90             | 479.13    |         |            |
| 48 hpi                                                                 | 22.51        | 25.701         | -3.187      | -11.91            | 3867.80   | 2757.21 | 1570.60    |
|                                                                        | 23.00        | 24.956         | -1.955      | -10.68            | 1646.6292 |         |            |
| 72 hpi                                                                 | 22.47        | 26.069         | -3.593      | -12.32            | 5124.87   | 9000.00 | 5480.26    |
|                                                                        | 22.47        | 27.401         | -4.922      | -13.65            | 12875.13  |         |            |
| Cal gene                                                               | 32.99        | 24.260         | 8.730       | 0                 | 1         | UN      | UN         |
| <i>Inoculation of RGNNV nodavirus on E-11 treated with CHT at 0.7%</i> |              |                |             |                   |           |         |            |
| 6 hpi                                                                  | 22.38        | 21.57          | 0.812       | -7.91             | 241.90554 | 328.50  | 122.46     |
|                                                                        | 22.04        | 22.01          | 0.033       | -8.697            | 415.09    |         |            |
| 24 hpi                                                                 | 22.99        | 22.121         | 0.875       | -7.85             | 231.56    | 280.55  | 69.27      |
|                                                                        | 23.02        | 22.655         | 0.366       | -8.36             | 329.53    |         |            |
| 48 hpi                                                                 | 26.74        | 24.501         | 2.239       | -6.49             | 89.96     | 177.98  | 124.47     |
|                                                                        | 26.53        | 25.856         | 0.675       | -8.05             | 266.00    |         |            |
| 72 hpi                                                                 | 27.22        | 26.469         | 0.757       | -7.97             | 251.30    | 351.98  | 142.382486 |
|                                                                        | 27.00        | 27.101         | -0.092      | -8.82             | 452.66    |         |            |
| Cal gene                                                               | 32.99        | 24.260         | 8.730       | 0                 | 1         | UN      | UN         |
| <i>Inoculation of RGNNV nodavirus on E-11 treated with CHT at 1%</i>   |              |                |             |                   |           |         |            |
| 6 hpi                                                                  | 22.08        | 22.057         | 0.025       | -8.70             | 417.40    | 428.99  | 16.39      |
|                                                                        | 22.05        | 22.11          | -0.053      | -8.78             | 440.59    |         |            |
| 24 hpi                                                                 | 23.00        | 23.01          | -0.004      | -8.73             | 425.87    | 431.25  | 7.60       |
|                                                                        | 23.01        | 23.05          | -0.04       | -8.770            | 436.63    |         |            |
| 48 hpi                                                                 | 29.57        | 29.501         | 0.073       | -8.65             | 403.74    | 422.47  | 26.48      |

|          |        |         |        |       |        |        |       |
|----------|--------|---------|--------|-------|--------|--------|-------|
|          | 29.501 | 29.556  | -0.055 | -8.78 | 441.20 |        |       |
| 72 hpi   | 27.446 | 27.369  | 0.077  | -8.65 | 402.62 | 418.42 | 22.34 |
|          | 27.369 | 27.401  | -0.032 | -8.76 | 434.22 |        |       |
| Cal gene | 32.991 | 24.2607 | 8.7303 | 0     | 1      | UN     | UN    |
